# Supplementary material for: Compartmentalized Cytokine Responses in Hidradenitis Suppurativa
Source: PubMed Central journal article supplement (PMC4474720; doi:10.1371/journal.pone.0130522), 2015-06-19
Supplement: pone.0130522.s001.pdf [file pone.0130522.s001.pdf]

| group    | stage      | gender | age   | il1medium | il1lps1  | il1candida | il1staph | il1medium: |
|----------|------------|--------|-------|-----------|----------|------------|----------|------------|
| Controls | Controls   | Male   | 25,00 | 75,00     | 1560,00  | 70,00      | 378,00   | 20,00      |
| Controls | Controls   | Female | 26,00 | 65,00     | 7040,00  | 60,00      | 1700,00  | 40,00      |
| Controls | Controls   | Male   | 34,00 | 45,00     | 5000,00  | 60,00      | 1880,00  | 30,00      |
| Controls | Controls   | Male   | 42,00 | 35,00     | 4780,00  | 85,00      | 713,00   | 20,00      |
| Controls | Controls   | Male   | 36,00 | 20,00     | 603,00   | 35,00      | 775,00   | 20,00      |
| Controls | Controls   | Male   | 37,00 | 193,00    | 2080,00  | 45,00      | 605,00   | 100,00     |
| Controls | Controls   | Male   | 27,00 | 78,00     | 20000,00 | 70,00      | 1145,00  | 40,00      |
| Controls | Controls   | Male   | 27,00 | 40,00     | 20000,00 | 83,00      | 1780,00  | 25,00      |
| Controls | Controls   | Male   | 32,00 | 20,00     | 1840,00  |            | 875,00   |            |
| Controls | Controls   | Male   | 32,00 | 20,00     | 5000,00  |            | 810,00   |            |
| Controls | Controls   | Male   | 42,00 | 20,00     | 2415,00  |            | 765,00   |            |
| Controls | Controls   | Male   | 42,00 | 240,00    | 400,00   |            | 20,00    |            |
| Controls | Controls   | Female | 27,00 | 40,00     | 2030,00  |            | 640,00   |            |
| Controls | Controls   | Female | 27,00 | 20,00     | 4520,00  |            | 1630,00  |            |
| Controls | Controls   | Female | 34,00 | 20,00     | 1030,00  |            | 1610,00  |            |
| Controls | Controls   | Female | 35,00 |           |          |            |          |            |
| Controls | Controls   | Female | 31,00 |           |          |            |          |            |
| Controls | Controls   | Female | 45,00 |           |          |            |          |            |
| Patients | Hurley II  | Female | 53,00 |           |          |            |          |            |
| Patients | Hurley I   | Female | 20,00 |           |          |            |          |            |
| Patients | Hurley I   | Female | 17,00 |           |          |            |          |            |
| Patients | Hurley II  | Female | 59,00 |           |          |            |          |            |
| Patients | Hurley I   | Female | 33,00 |           |          |            |          |            |
| Patients | Hurley III | Male   | 23,00 |           |          |            |          |            |
| Patients | Hurley III | Female | 38,00 |           |          |            |          |            |
| Patients | Hurley II  | Female | 38,00 |           |          |            |          |            |
| Patients | Hurley II  | Female | 47,00 | 230,00    | 5420,00  |            |          |            |
| Patients | Hurley III | Male   | 36,00 | 20,00     | 208,00   | 20,00      | 148,00   | 20,00      |
| Patients | Hurley III | Male   | 57,00 | 50,00     | 10000,00 |            | 450,00   |            |
| Patients | Hurley II  | Female | 34,00 |           |          |            |          |            |
| Patients | Hurley III | Female | 48,00 |           |          |            |          |            |
| Patients | Hurley II  | Male   | 45,00 |           |          |            |          |            |
| Patients | Hurley III | Female | 47,00 |           |          |            |          |            |
| Patients | Hurley II  | Male   | 69,00 |           |          |            |          |            |
| Patients | Hurley I   | Female | 45,00 |           |          |            |          |            |
| Patients | Hurley III | Male   | 28,00 |           |          |            |          |            |
| Patients | Hurley III | Male   | 46,00 |           |          |            |          |            |
| Patients | Hurley III | Male   | 25,00 |           |          |            |          |            |
| Patients | Hurley II  | Male   | 27,00 |           |          |            |          |            |
| Patients | Hurley I   | Female | 29,00 |           |          |            |          |            |
| Patients | Hurley I   | Male   | 36,00 |           |          |            |          |            |
| Patients | Hurley I   | Female | 26,00 |           |          |            |          |            |
| Patients | Hurley II  | Female | 25,00 |           |          |            |          |            |
| Patients | Hurley II  | Female | 48,00 |           |          |            |          |            |
| Patients | Hurley II  | Female | 36,00 |           |          |            |          |            |
| Patients | Hurley II  | Female | 50,00 |           |          |            |          |            |

|          |            |        |       |         |         |        |         |       |
|----------|------------|--------|-------|---------|---------|--------|---------|-------|
| Patients | Hurley II  | Female | 44,00 |         |         |        |         |       |
| Patients | Hurley III | Female | 35,00 |         |         |        |         |       |
| Patients | Hurley II  | Male   | 44,00 |         |         |        |         |       |
| Patients | Hurley II  | Female | 12,00 |         |         |        |         |       |
| Patients | Hurley II  | Female | 17,00 |         |         |        |         |       |
| Patients | Hurley III | Male   | 50,00 |         |         |        |         |       |
| Patients | Hurley II  | Female | 17,00 |         |         |        |         |       |
| Patients | Hurley III | Male   | 32,00 | 265,00  | 620,00  |        |         |       |
| Patients | Hurley I   | Female | 36,00 |         |         |        |         |       |
| Patients | Hurley I   | Male   | 23,00 |         |         |        |         |       |
| Patients | Hurley I   | Male   | 31,00 |         |         |        |         |       |
| Patients | Hurley III | Male   | 52,00 |         |         |        |         |       |
| Patients | Hurley I   | Female | 48,00 |         |         |        |         |       |
| Patients | Hurley II  | Male   | 41,00 |         |         |        |         |       |
| Patients | Hurley III | Female | 55,00 | 240,00  | 5000,00 |        | 1665,00 |       |
| Patients | Hurley I   | Female | 62,00 |         |         |        |         |       |
| Patients | Hurley III | Female | 37,00 | 225,00  | 703,00  |        | 390,00  |       |
| Patients | Hurley II  | Male   | 24,00 |         |         |        |         |       |
| Patients | Hurley III | Male   | 21,00 |         |         |        |         |       |
| Patients | Hurley II  | Female | 30,00 |         |         |        |         |       |
| Patients | Hurley II  | Female | 54,00 |         |         |        |         |       |
| Patients | Hurley I   | Male   | 44,00 |         |         |        |         |       |
| Patients | Hurley III | Male   | 47,00 |         |         |        |         |       |
| Patients | Hurley I   | Female | 43,00 |         |         |        |         |       |
| Patients | Hurley III | Female | 50,00 |         |         |        |         |       |
| Patients | Hurley I   | Female | 20,00 |         |         |        |         |       |
| Patients | Hurley III | Male   | 53,00 | 100,00  | 5000,00 | 130,00 | 3000,00 | 93,00 |
| Patients | Hurley III | Male   | 27,00 | 1128,00 | 1360,00 | 195,00 | 4400,00 | 30,00 |
| Patients | Hurley I   | Female | 51,00 | 1128,00 | 1770,00 | 155,00 | 2738,00 | 30,00 |
| Patients | Hurley I   | Female | 30,00 |         |         |        |         |       |
| Patients | Hurley I   | Female | 50,00 |         |         |        |         |       |
| Patients | Hurley II  | Male   | 28,00 |         |         |        |         |       |
| Patients | Hurley II  | Female | 44,00 |         |         |        |         |       |
| Patients | Hurley II  | Female | 37,00 |         |         |        |         |       |
| Patients | Hurley III | Male   | 50,00 |         |         |        |         |       |
| Patients | Hurley III | Female | 57,00 |         |         |        |         |       |
| Patients | Hurley II  | Female | 59,00 |         |         |        |         |       |
| Patients | Hurley III | Male   | 29,00 |         |         |        |         |       |
| Patients | Hurley II  | Female | 32,00 |         |         |        |         |       |
| Patients | Hurley I   | Male   | 30,00 |         |         |        |         |       |
| Patients | Hurley II  | Female | 28,00 |         |         |        |         |       |
| Patients | Hurley II  | Female | 39,00 |         |         |        |         |       |
| Patients | Hurley II  | Female | 41,00 |         |         |        |         |       |
| Patients | Hurley II  | Male   | 32,00 |         |         |        |         |       |
| Patients | Hurley II  | Female | 50,00 |         |         |        |         |       |
| Patients | Hurley II  | Male   | 35,00 |         |         |        |         |       |
| Patients | Hurley II  | Female | 36,00 |         |         |        |         |       |

|          |            |        |       |         |          |        |         |        |
|----------|------------|--------|-------|---------|----------|--------|---------|--------|
| Patients | Hurley III | Female | 56,00 | 310,00  | 198,00   |        |         |        |
| Patients | Hurley III | Male   | 68,00 |         |          |        |         |        |
| Patients | Hurley III | Male   | 48,00 |         |          |        |         |        |
| Patients | Hurley I   | Female | 30,00 |         |          |        |         |        |
| Patients | Hurley II  | Male   | 35,00 | 20,00   |          | 20,00  | 2060,00 |        |
| Patients | Hurley III | Male   | 36,00 | 220,00  | 2215,00  |        |         |        |
| Patients | Hurley II  | Male   | 37,00 |         |          |        |         |        |
| Patients | Hurley II  | Female | 54,00 |         |          |        |         |        |
| Patients | Hurley II  | Female | 31,00 |         |          |        |         |        |
| Patients | Hurley III | Male   | 31,00 |         |          |        |         |        |
| Patients | Hurley III | Female | 43,00 | 20,00   | 1700,00  | 90,00  | 535,00  | 20,00  |
| Patients | Hurley II  | Male   | 54,00 |         |          |        |         |        |
| Patients | Hurley III | Female | 24,00 |         |          |        |         |        |
| Patients | Hurley III | Male   | 30,00 | 258,00  | 12400,00 | 260,00 | 1900,00 | 345,00 |
| Patients | Hurley II  | Male   | 21,00 |         |          |        |         |        |
| Patients | Hurley II  | Male   |       |         |          |        |         |        |
| Patients | Hurley II  | Female | 37,00 |         |          |        |         |        |
| Patients | Hurley III | Male   | 51,00 | 195,00  | 1198,00  |        | 1458,00 |        |
| Patients | Hurley II  |        |       |         |          |        |         |        |
| Patients | Hurley III | Male   | 20,00 | 1185,00 | 520,00   | 455,00 | 983,00  | 480,00 |
| Patients | Hurley III | Female | 38,00 |         |          |        |         |        |
| Patients |            |        |       |         |          |        |         |        |
| Patients |            |        |       |         |          |        |         |        |
| Patients | Hurley I   | Female | 23,00 |         |          |        |         |        |
| Patients | Hurley I   | Female | 30,00 |         |          |        |         |        |
| Patients | Hurley I   | Female | 30,00 |         |          |        |         |        |
| Patients | Hurley I   | Female | 27,00 |         |          |        |         |        |
| Patients | Hurley I   | Female | 40,00 |         |          |        |         |        |
| Patients | Hurley II  | Female | 22,00 |         |          |        |         |        |
| Patients | Hurley III | Male   | 42,00 | 1620,00 | 4120,00  | 428,00 | 3920,00 | 75,00  |
| Patients | Hurley I   | Female | 29,00 |         |          |        |         |        |
| Patients | Hurley III | Female | 48,00 |         |          |        |         |        |
| Patients | Hurley I   | Male   | 32,00 |         |          |        |         |        |
| Patients | Hurley I   | Male   | 28,00 |         |          |        |         |        |
| Patients | Hurley III | Female | 46,00 |         |          |        |         |        |
| Patients | Hurley III | Male   | 38,00 |         |          |        |         |        |
| Patients | Hurley III | Female | 44,00 |         |          |        |         |        |
| Patients | Hurley III | Female | 21,00 |         |          |        |         |        |
| Patients | Hurley I   | Female | 30,00 |         |          |        |         |        |
| Patients | Hurley II  | Female | 48,00 |         |          |        |         |        |
| Patients | Hurley I   | Female | 23,00 |         |          |        |         |        |
| Patients | Hurley III | Female | 35,00 |         |          |        |         |        |
| Patients | Hurley I   | Female | 44,00 |         |          |        |         |        |
| Patients | Hurley I   | Female | 50,00 |         |          |        |         |        |
| Patients | Hurley I   | Female |       |         |          |        |         |        |
| Patients | Hurley I   | Female | 39,00 | 215,00  | 7080,00  |        |         |        |
| Patients | Hurley III | Female | 63,00 | 20,00   | 265,00   | 20,00  | 168,00  | 20,00  |

|          |            |        |       |        |         |       |         |       |  |
|----------|------------|--------|-------|--------|---------|-------|---------|-------|--|
| Patients | Hurley III | Female | 27,00 |        |         |       |         |       |  |
| Patients | Hurley III | Male   | 52,00 |        |         |       |         |       |  |
| Patients | Hurley II  | Male   | 31,00 |        |         |       |         |       |  |
| Patients | Hurley II  | Female | 36,00 |        |         |       |         |       |  |
| Patients | Hurley II  | Female | 55,00 |        |         |       |         |       |  |
| Patients | Hurley III | Male   | 26,00 |        |         |       |         |       |  |
| Patients | Hurley II  | Male   | 27,00 |        |         |       |         |       |  |
| Patients | Hurley III | Male   | 24,00 | 20,00  | 95,00   | 20,00 | 255,00  | 20,00 |  |
| Patients | Hurley III | Female | 41,00 |        |         |       |         |       |  |
| Patients | Hurley III | Female | 37,00 | 278,00 | 6180,00 |       |         |       |  |
| Patients | Hurley III | Female | 42,00 |        |         |       |         |       |  |
| Patients | Hurley III | Female |       | 20,00  | 1725,00 |       | 850,00  |       |  |
| Patients | Hurley III | Male   | 25,00 |        |         |       |         |       |  |
| Patients | Hurley III | Male   | 59,00 |        |         |       |         |       |  |
| Patients | Hurley II  | Female | 33,00 |        |         |       |         |       |  |
| Patients | Hurley II  | Female | 35,00 |        |         |       |         |       |  |
| Patients | Hurley III | Female | 23,00 | 20,00  | 338,00  | 45,00 | 343,00  | 20,00 |  |
| Patients | Hurley III | Female | 28,00 |        |         |       |         |       |  |
| Patients | Hurley II  | Female | 51,00 |        |         |       |         |       |  |
| Patients | Hurley II  | Female | 36,00 | 20,00  | 1283,00 | 20,00 | 590,00  | 20,00 |  |
| Patients | Hurley II  | Female | 27,00 |        |         |       |         |       |  |
| Patients | Hurley II  | Male   | 34,00 |        |         |       |         |       |  |
| Patients | Hurley II  | Female | 46,00 | 20,00  | 20,00   | 20,00 | 20,00   | 20,00 |  |
| Patients | Hurley II  | Female | 54,00 |        |         |       |         |       |  |
| Patients | Hurley II  | Male   | 37,00 | 40,00  | 1285,00 | 70,00 | 2200,00 | 35,00 |  |
| Patients | Hurley I   | Female | 32,00 |        |         |       |         |       |  |
| Patients | Hurley II  | Female | 24,00 |        |         |       |         |       |  |
| Patients | Hurley II  | Female | 35,00 |        |         |       |         |       |  |
| Patients | Hurley I   | Female | 65,00 |        |         |       |         |       |  |
| Patients | Hurley II  | Female | 42,00 |        |         |       |         |       |  |
| Patients | Hurley II  | Female | 20,00 |        |         |       |         |       |  |
| Patients | Hurley II  | Male   | 64,00 |        |         |       |         |       |  |
| Patients | Hurley II  | Female | 38,00 |        |         |       |         |       |  |
| Patients | Hurley II  | Female | 44,00 |        |         |       |         |       |  |
| Patients | Hurley I   | Female | 32,00 |        |         |       |         |       |  |
| Patients | Hurley II  | Female | 37,00 |        |         |       |         |       |  |
| Patients | Hurley I   | Female | 27,00 |        |         |       |         |       |  |
| Patients | Hurley I   | Female | 46,00 |        |         |       |         |       |  |
| Patients | Hurley III | Female | 63,00 |        |         |       |         |       |  |
| Patients | Hurley II  | Female | 51,00 |        |         |       |         |       |  |
| Patients | Hurley III | Female | 32,00 |        |         |       |         |       |  |
| Patients | Hurley III | Male   | 30,00 |        |         |       |         |       |  |
| Patients | Hurley II  | Female | 35,00 | 20,00  | 2270,00 |       | 640,00  |       |  |
| Patients | Hurley II  | Female | 37,00 |        |         |       |         |       |  |
| Patients | Hurley II  | Female | 41,00 | 20,00  | 485,00  |       | 1590,00 |       |  |
| Patients | Hurley III | Female | 33,00 |        |         |       |         |       |  |
| Patients | Hurley I   | Female | 48,00 |        |         |       |         |       |  |

|          |            |        |       |        |         |        |         |       |
|----------|------------|--------|-------|--------|---------|--------|---------|-------|
| Patients | Hurley II  | Male   | 27,00 |        |         |        |         |       |
| Patients | Hurley I   | Female | 61,00 |        |         |        |         |       |
| Patients | Hurley II  | Female | 32,00 |        |         |        |         |       |
| Patients | Hurley I   | Female | 26,00 |        |         |        |         |       |
| Patients | Hurley I   | Male   | 45,00 |        |         |        |         |       |
| Patients | Hurley I   | Female | 27,00 |        |         |        |         |       |
| Patients | Hurley II  | Male   | 49,00 | 80,00  | 20,00   |        | 20,00   |       |
| Patients | Hurley III | Female | 44,00 | 205,00 | 4420,00 |        | 5860,00 |       |
| Patients | Hurley III | Male   | 32,00 |        |         |        |         |       |
| Patients | Hurley III | Female | 27,00 |        |         |        |         |       |
| Patients | Hurley I   | Male   | 32,00 |        |         |        |         |       |
| Patients | Hurley III | Female | 23,00 |        |         |        |         |       |
| Patients | Hurley II  | Female | 28,00 |        |         |        |         |       |
| Patients | Hurley I   | Female | 55,00 | 20,00  | 20,00   | 20,00  | 135,00  | 20,00 |
| Patients | Hurley II  | Female | 40,00 |        |         |        |         |       |
| Patients | Hurley III | Female | 56,00 |        |         |        |         |       |
| Patients | Hurley I   | Female | 18,00 | 20,00  | 1980,00 | 20,00  | 153,00  | 20,00 |
| Patients | Hurley III | Female | 37,00 |        |         |        |         |       |
| Patients | Hurley I   | Female | 45,00 |        |         |        |         |       |
| Patients | Hurley I   | Male   | 23,00 | 30,00  | 2430,00 |        | 725,00  |       |
| Patients | Hurley I   | Female | 39,00 |        |         |        |         |       |
| Patients | Hurley I   | Female | 28,00 |        |         |        |         |       |
| Patients | Hurley I   | Male   | 46,00 |        |         |        |         |       |
| Patients | Hurley II  | Male   | 49,00 |        |         |        |         |       |
| Patients | Hurley II  | Female | 27,00 |        |         |        |         |       |
| Patients | Hurley II  | Female | 46,00 |        |         |        |         |       |
| Patients | Hurley II  | Female | 37,00 | 203,00 | 4320,00 | 303,00 | 1193,00 | 45,00 |
| Patients | Hurley III | Female | 64,00 | 40,00  | 1018,00 | 75,00  | 483,00  | 50,00 |
| Patients | Hurley II  | Male   | 31,00 |        |         |        |         |       |
| Patients | Hurley II  | Male   | 42,00 |        |         |        |         |       |
| Patients | Hurley II  | Male   | 33,00 |        |         |        |         |       |
| Patients | Hurley I   | Female | 20,00 |        |         |        |         |       |
| Patients | Hurley III | Male   | 53,00 |        |         |        |         |       |
| Patients | Hurley I   | Male   | 40,00 |        |         |        |         |       |
| Patients | Hurley I   | Male   | 42,00 |        |         |        |         |       |
| Patients | Hurley III | Female | 42,00 | 20,00  | 2180,00 | 115,00 | 1075,00 | 20,00 |
| Patients | Hurley II  | Male   | 37,00 |        |         |        |         |       |
| Patients | Hurley III | Male   | 70,00 |        |         |        |         |       |
| Patients | Hurley II  | Female | 49,00 |        |         |        |         |       |
| Patients | Hurley II  | Female | 26,00 |        |         |        |         |       |
| Patients | Hurley III | Male   | 60,00 | 98,00  | 5000,00 | 135,00 | 2620,00 | 83,00 |
| Patients | Hurley III | Female | 28,00 |        |         |        |         |       |
| Patients | Hurley II  | Male   | 45,00 |        |         |        |         |       |
| Patients | Hurley II  | Female | 44,00 | 63,00  | 1483,00 | 105,00 | 728,00  | 50,00 |
| Patients | Hurley I   | Male   | 29,00 |        |         |        |         |       |
| Patients | Hurley II  | Female | 40,00 |        |         |        |         |       |
| Patients | Hurley III | Male   | 46,00 |        |         |        |         |       |

Patients Hurley III Female 41,00

| il1lps1ada | il1candidaa | il1staphada | tnfmedium | tnflps1 | tnfcandida | tnfstaph | tnfmedium | tnflps1ada |
|------------|-------------|-------------|-----------|---------|------------|----------|-----------|------------|
| 1293,00    | 60,00       | 305,00      | 153,00    | 1425,00 | 213,00     | 670,00   | 60,00     | 938,00     |
| 4780,00    | 65,00       | 1620,00     | 248,00    | 3593,00 | 278,00     | 1988,00  | 125,00    | 2618,00    |
| 5000,00    | 50,00       | 1780,00     | 315,00    | 350,00  | 275,00     | 945,00   | 85,00     | 350,00     |
| 4840,00    | 55,00       | 863,00      | 20,00     | 315,00  |            |          |           |            |
| 1170,00    | 35,00       | 478,00      | 20,00     | 145,00  |            |          |           |            |
| 2000,00    | 70,00       | 938,00      | 20,00     | 320,00  |            |          |           |            |
| 20000,00   | 123,00      | 1128,00     | 20,00     | 725,00  |            |          |           |            |
| 20000,00   | 50,00       | 1580,00     | 225,00    |         |            |          |           |            |
|            |             |             | 165,00    | 1170,00 |            | 340,00   |           |            |
|            |             |             | 20,00     | 2160,00 |            | 1260,00  |           |            |
|            |             |             | 20,00     | 1580,00 |            | 1510,00  |           |            |
|            |             |             | 20,00     | 175,00  |            |          |           |            |
|            |             |             | 20,00     | 1585,00 |            | 810,00   |           |            |
|            |             |             | 20,00     | 4800,00 |            | 580,00   |           |            |
|            |             |             | 1335,00   |         |            | 965,00   |           |            |
|            |             |             | 20,00     | 20,00   |            | 20,00    | 20,00     | 20,00      |
|            |             |             | 20,00     | 1488,00 |            |          |           |            |
| 120,00     | 20,00       | 150,00      | 80,00     | 80,00   | 80,00      | 180,00   | 80,00     | 80,00      |
|            |             |             | 195,00    | 1260,00 |            | 580,00   | 1445,00   | 1100,00    |
|            |             |             | 32,00     | 9530,00 |            | 5761,00  | 653,00    | 8503,00    |
|            |             |             | 20,00     | 1429,00 |            | 20,00    | 20,00     | 143,00     |
|            |             |             | 20,00     | 5080,00 |            | 1340,00  | 20,00     | 2720,00    |

|        |         |          |        |         |
|--------|---------|----------|--------|---------|
| 346,00 | 1450,00 | 20000,00 | 134,00 | 2037,00 |
| 25,00  | 20,00   | 20,00    | 20,00  | 20,00   |

|       |       |
|-------|-------|
| 20,00 | 20,00 |
|-------|-------|

|         |         |          |       |         |
|---------|---------|----------|-------|---------|
| 2345,00 | 9840,00 | 10000,00 | 20,00 | 7180,00 |
|---------|---------|----------|-------|---------|

|       |         |         |
|-------|---------|---------|
| 20,00 | 2165,00 | 1000,00 |
|-------|---------|---------|

|        |        |        |
|--------|--------|--------|
| 140,00 | 373,00 | 425,00 |
|--------|--------|--------|

|         |        |         |       |       |       |       |       |
|---------|--------|---------|-------|-------|-------|-------|-------|
| 5000,00 | 123,00 | 2980,00 | 20,00 | 20,00 | 20,00 | 95,00 | 20,00 |
| 735,00  | 120,00 | 2820,00 |       |       |       |       |       |
| 1798,00 | 75,00  | 1961,00 |       |       |       |       |       |

|        |         |         |        |        |
|--------|---------|---------|--------|--------|
| 544,00 | 1310,00 | 1786,00 | 868,00 | 622,00 |
|--------|---------|---------|--------|--------|

|       |         |         |         |         |
|-------|---------|---------|---------|---------|
| 20,00 | 100,00  | 20,00   | 20,00   | 20,00   |
| 20,00 | 6666,00 | 9217,00 | 1252,00 | 4998,00 |



120,00 75,00

290,00 275,00 20,00 800,00 80,00 1380,00  
20,00 280,00 143,00 20,00 327,00

1298,00 50,00 523,00 80,00 438,00 95,00 545,00 80,00 355,00

12600,00 328,00 1980,00

20,00 8808,00 10000,00 395,00 3000,00

555,00 593,00 908,00 20,00 2362,00 20,00 20,00 1480,00  
20,00 327,00 349,00 20,00 20,00

20,00 700,00 1340,00 20,00 340,00

2800,00 255,00 4300,00

246,00 984,00 959,00 228,00 402,00

80,00 2948,00

328,00 20,00 180,00 80,00 80,00 80,00 265,00 80,00 80,00

|       |       |        |       |         |       |         |       |       |
|-------|-------|--------|-------|---------|-------|---------|-------|-------|
| 20,00 | 20,00 | 205,00 | 80,00 | 80,00   | 80,00 | 80,00   | 80,00 | 80,00 |
|       |       |        | 20,00 | 2656,00 |       |         |       |       |
|       |       |        | 20,00 | 80,00   |       | 20,00   | 20,00 | 20,00 |
|       |       |        | 20,00 | 1810,00 |       | 1150,00 |       |       |

|       |       |        |       |        |       |        |       |       |
|-------|-------|--------|-------|--------|-------|--------|-------|-------|
| 78,00 | 40,00 | 250,00 | 80,00 | 780,00 | 80,00 | 135,00 | 80,00 | 80,00 |
|-------|-------|--------|-------|--------|-------|--------|-------|-------|

|        |       |        |       |       |       |        |       |       |
|--------|-------|--------|-------|-------|-------|--------|-------|-------|
| 913,00 | 20,00 | 498,00 | 80,00 | 90,00 | 80,00 | 225,00 | 80,00 | 80,00 |
|--------|-------|--------|-------|-------|-------|--------|-------|-------|

|        |       |       |       |       |       |       |       |       |
|--------|-------|-------|-------|-------|-------|-------|-------|-------|
| 100,00 | 20,00 | 20,00 | 80,00 | 80,00 | 80,00 | 80,00 | 80,00 | 80,00 |
|--------|-------|-------|-------|-------|-------|-------|-------|-------|

|         |        |         |       |         |  |          |       |         |
|---------|--------|---------|-------|---------|--|----------|-------|---------|
| 1475,00 | 178,00 | 2560,00 | 20,00 | 7800,00 |  | 10000,00 | 20,00 | 5180,00 |
|---------|--------|---------|-------|---------|--|----------|-------|---------|

|  |  |  |       |         |  |         |       |          |
|--|--|--|-------|---------|--|---------|-------|----------|
|  |  |  | 78,00 | 4193,00 |  | 7804,00 | 20,00 | 20000,00 |
|--|--|--|-------|---------|--|---------|-------|----------|

|  |  |  |         |         |  |         |       |       |
|--|--|--|---------|---------|--|---------|-------|-------|
|  |  |  | 1420,00 | 1140,00 |  | 1460,00 | 20,00 | 20,00 |
|--|--|--|---------|---------|--|---------|-------|-------|

|  |  |  |       |         |  |         |  |  |
|--|--|--|-------|---------|--|---------|--|--|
|  |  |  | 20,00 | 1475,00 |  | 5000,00 |  |  |
|--|--|--|-------|---------|--|---------|--|--|

|  |  |  |       |        |  |        |  |  |
|--|--|--|-------|--------|--|--------|--|--|
|  |  |  | 20,00 | 470,00 |  | 715,00 |  |  |
|--|--|--|-------|--------|--|--------|--|--|

|         |        |         |        |         |        |         |        |          |
|---------|--------|---------|--------|---------|--------|---------|--------|----------|
|         |        |         | 82,00  | 431,00  |        | 611,00  | 53,00  | 132,00   |
|         |        |         | 20,00  | 928,00  |        | 723,00  | 20,00  | 362,00   |
|         |        |         | 235,00 | 280,00  |        | 215,00  |        |          |
|         |        |         | 390,00 | 2573,00 |        | 3980,00 |        |          |
| 85,00   | 20,00  | 95,00   | 80,00  | 115,00  | 80,00  | 2355,00 | 80,00  | 605,00   |
| 1960,00 | 150,00 | 125,00  | 80,00  | 1878,00 | 80,00  | 620,00  | 80,00  | 755,00   |
|         |        |         | 20,00  | 1225,00 |        | 530,00  |        |          |
|         |        |         | 20,00  | 203,00  |        | 1320,00 | 20,00  | 100,00   |
|         |        |         | 20,00  | 20,00   |        | 480,00  | 20,00  | 920,00   |
|         |        |         | 20,00  | 540,00  |        | 20,00   | 180,00 | 320,00   |
| 2700,00 | 80,00  | 813,00  |        |         |        |         |        |          |
| 1293,00 | 128,00 | 513,00  |        |         |        |         |        |          |
| 2860,00 | 30,00  | 1103,00 | 718,00 | 2190,00 | 850,00 | 3728,00 | 605,00 | 2728,00  |
|         |        |         | 140,00 | 1850,00 |        | 2260,00 | 35,00  | 10000,00 |
| 5000,00 | 115,00 | 2280,00 | 80,00  | 80,00   |        | 9733,00 | 20,00  | 1563,00  |
|         |        |         | 20,00  | 120,00  |        | 20,00   | 20,00  | 20,00    |
| 1900,00 | 90,00  | 788,00  |        |         |        |         |        |          |



| tnfcandida: | tnfstaphad | il6medium | il6lps1  | il6candida | il6staph  | il6medium: | il6lps1ada | il22mediun |
|-------------|------------|-----------|----------|------------|-----------|------------|------------|------------|
| 80,00       | 345,00     | 195,00    | 15500,00 | 10400,00   | 50,00     | 65,00      | 1500,00    | 115,00     |
| 263,00      | 1213,00    | 80,00     |          | 5200,00    | 7900,00   | 80,00      | 5700,00    | 410,00     |
| 80,00       | 895,00     | 90,00     | 20700,00 | 10200,00   | 25500,00  | 90,00      | 1735,00    | 2485,00    |
|             |            | 20,00     | 5660,00  | 15450,00   | 19300,00  | 160,00     |            | 125,00     |
|             |            | 20,00     | 25050,00 | 26400,00   | 23000,00  | 20,00      |            | 510,00     |
|             |            | 20,00     | 73000,00 | 141000,00  | 143000,00 | 20,00      |            |            |
|             |            | 20,00     |          | 45000,00   | 139000,00 | 20,00      |            |            |
|             |            | 20,00     |          | 7410,00    | 109000,00 |            |            |            |

20,00

|       |        |         |         |       |         |       |        |         |
|-------|--------|---------|---------|-------|---------|-------|--------|---------|
|       |        | 1090,00 | 8925,00 |       |         |       |        |         |
| 80,00 | 155,00 | 90,00   | 1970,00 | 90,00 | 1730,00 | 90,00 | 820,00 | 1500,00 |
|       | 140,00 |         |         |       |         |       |        | 380,00  |

115,00

7680,00

40,00

20,00

860,00

1281,00  
20,00

95,00

20,00 3525,00

10000,00

1325,00

40,00

20,00

1490,00

1407,00

20,00  
7442,00

20,00 180,00

480,00  
120,00 20,00 5025,00

80,00 395,00 625,00 3350,00 220,00 4535,00 160,00 4715,00

10000,00 1340,00

20,00  
20,00 215,00

1040,00

857,00

240,00

80,00 595,00 20,00 3945,00  
90,00 890,00 90,00 825,00 90,00 990,00

|       |       |       |         |       |        |       |       |       |
|-------|-------|-------|---------|-------|--------|-------|-------|-------|
| 80,00 | 80,00 | 90,00 | 90,00   | 90,00 | 230,00 | 90,00 | 90,00 | 40,00 |
|       |       | 20,00 | 5925,00 |       |        |       |       | 85,00 |

|       |       |       |        |       |        |       |        |
|-------|-------|-------|--------|-------|--------|-------|--------|
| 80,00 | 80,00 | 90,00 | 500,00 | 90,00 | 270,00 | 90,00 | 130,00 |
|-------|-------|-------|--------|-------|--------|-------|--------|

|       |        |        |         |       |         |       |         |
|-------|--------|--------|---------|-------|---------|-------|---------|
| 80,00 | 383,00 | 160,00 | 3250,00 | 90,00 | 2530,00 | 90,00 | 2230,00 |
|-------|--------|--------|---------|-------|---------|-------|---------|

|       |        |       |       |       |       |       |       |
|-------|--------|-------|-------|-------|-------|-------|-------|
| 80,00 | 80,00  | 90,00 | 90,00 | 90,00 | 90,00 | 90,00 | 90,00 |
|       | 160,00 |       |       |       |       |       |       |

|  |         |  |  |  |  |  |  |       |
|--|---------|--|--|--|--|--|--|-------|
|  | 8515,00 |  |  |  |  |  |  | 40,00 |
|--|---------|--|--|--|--|--|--|-------|

295,00  
135,00

20,00

330,00

290,00



431,00  
385,00

80,00 1160,00 90,00 90,00 90,00 270,00 90,00 90,00

80,00 80,00 90,00 1515,00 90,00 230,00 90,00 1280,00 215,00  
40,00

200,00  
240,00

20,00

480,00 3813,00 90,00 12600,00 260,00 3670,00 90,00 6000,00 80,00

1220,00  
6551,00 145,00

20,00



| il22candida | il22staph | il22mediun | il22candida | il22staphac | hbd2mediu | hbd2candid | hbd2staph | hbd2ada |
|-------------|-----------|------------|-------------|-------------|-----------|------------|-----------|---------|
| 115,00      | 315,00    | 40,00      | 135,00      | 220,00      | 5,00      | 5,00       | 5,00      | 5,00    |
| 2040,00     | 1485,00   | 145,00     |             | 1795,00     | 5,00      | 5,00       | 5,00      | 5,00    |
| 7295,00     | 3915,00   | 525,00     | 10000,00    | 3310,00     | 5,00      | 5,00       | 5,00      | 5,00    |
| 525,00      | 2160,00   | 40,00      | 375,00      | 2630,00     | 5,00      | 5,00       | 5,00      | 5,00    |
| 640,00      | 1015,00   | 40,00      | 590,00      | 950,00      | 5,00      | 5,00       | 5,00      | 5,00    |

|         |         |        |         |         |      |      |      |      |
|---------|---------|--------|---------|---------|------|------|------|------|
| 795,00  | 385,00  | 100,00 | 915,00  | 1545,00 | 5,00 | 5,00 | 5,00 | 5,00 |
| 2945,00 | 1370,00 | 475,00 | 4895,00 | 2440,00 | 5,00 | 5,00 | 5,00 | 5,00 |

|        |        |       |       |       |      |      |      |      |
|--------|--------|-------|-------|-------|------|------|------|------|
| 280,00 | 125,00 | 40,00 | 40,00 | 40,00 | 5,00 | 5,00 | 5,00 | 5,00 |
|--------|--------|-------|-------|-------|------|------|------|------|

|        |         |       |        |        |      |      |      |      |
|--------|---------|-------|--------|--------|------|------|------|------|
| 340,00 | 1135,00 | 40,00 | 465,00 | 855,00 | 5,00 | 5,00 | 5,00 | 5,00 |
|--------|---------|-------|--------|--------|------|------|------|------|

|         |       |       |        |        |      |      |      |      |
|---------|-------|-------|--------|--------|------|------|------|------|
| 1005,00 | 85,00 | 40,00 | 400,00 | 105,00 | 5,00 | 5,00 | 5,00 | 5,00 |
|---------|-------|-------|--------|--------|------|------|------|------|

|         |         |        |         |         |      |      |      |      |
|---------|---------|--------|---------|---------|------|------|------|------|
| 1690,00 | 1250,00 | 365,00 | 1000,00 | 1490,00 | 5,00 | 5,00 | 5,00 | 5,00 |
|---------|---------|--------|---------|---------|------|------|------|------|

|        |       |       |        |        |      |      |      |      |
|--------|-------|-------|--------|--------|------|------|------|------|
| 110,00 | 40,00 | 40,00 | 125,00 | 565,00 | 5,00 | 5,00 | 5,00 | 5,00 |
|--------|-------|-------|--------|--------|------|------|------|------|

|          |          |         |         |         |      |      |      |      |
|----------|----------|---------|---------|---------|------|------|------|------|
| 10000,00 | 10000,00 | 2635,00 | 7970,00 | 9665,00 | 5,00 | 5,00 | 5,00 | 5,00 |
|----------|----------|---------|---------|---------|------|------|------|------|

3605,00 955,00 1000,00 3200,00 795,00 5,00 5,00 5,00 5,00

895,00 580,00 150,00 1045,00 980,00 5,00 5,00 5,00 5,00

1515,00 710,00 40,00 2495,00 510,00 5,00 5,00 5,00 5,00

|         |         |        |         |         |      |      |      |      |
|---------|---------|--------|---------|---------|------|------|------|------|
| 370,00  | 40,00   | 40,00  | 495,00  | 40,00   | 5,00 | 5,00 | 5,00 | 5,00 |
| 1115,00 | 1585,00 | 115,00 | 9045,00 | 1210,00 | 5,00 | 5,00 | 5,00 | 5,00 |

|        |        |       |       |        |      |      |      |      |
|--------|--------|-------|-------|--------|------|------|------|------|
| 150,00 | 630,00 | 40,00 | 40,00 | 415,00 | 5,00 | 5,00 | 5,00 | 5,00 |
|--------|--------|-------|-------|--------|------|------|------|------|

|         |         |        |         |         |      |      |      |      |
|---------|---------|--------|---------|---------|------|------|------|------|
| 1320,00 | 2430,00 | 265,00 | 1625,00 | 2165,00 | 5,00 | 5,00 | 5,00 | 5,00 |
| 290,00  | 610,00  | 125,00 | 345,00  | 615,00  | 5,00 | 5,00 | 5,00 | 5,00 |

|        |         |        |         |         |      |      |      |      |
|--------|---------|--------|---------|---------|------|------|------|------|
| 740,00 | 2330,00 | 225,00 | 1625,00 | 3720,00 | 5,00 | 5,00 | 5,00 | 5,00 |
|--------|---------|--------|---------|---------|------|------|------|------|

|        |        |        |        |        |      |      |      |      |
|--------|--------|--------|--------|--------|------|------|------|------|
| 295,00 | 370,00 | 240,00 | 895,00 | 520,00 | 5,00 | 5,00 | 5,00 | 5,00 |
|--------|--------|--------|--------|--------|------|------|------|------|

|        |        |        |        |        |      |      |      |      |
|--------|--------|--------|--------|--------|------|------|------|------|
| 140,00 | 215,00 | 170,00 | 215,00 | 270,00 | 5,00 | 5,00 | 5,00 | 5,00 |
| 345,00 | 675,00 | 105,00 | 165,00 | 925,00 | 5,00 | 5,00 | 5,00 | 5,00 |

|        |        |       |        |        |      |      |      |      |
|--------|--------|-------|--------|--------|------|------|------|------|
| 180,00 | 145,00 | 40,00 | 450,00 | 180,00 | 5,00 | 5,00 | 5,00 | 5,00 |
|--------|--------|-------|--------|--------|------|------|------|------|

|         |         |        |         |         |      |      |      |      |
|---------|---------|--------|---------|---------|------|------|------|------|
| 5470,00 | 4940,00 | 190,00 | 3205,00 | 4220,00 | 5,00 | 5,00 | 5,00 | 5,00 |
|---------|---------|--------|---------|---------|------|------|------|------|









|      |      |         |        |         |        |         |        |         |
|------|------|---------|--------|---------|--------|---------|--------|---------|
|      |      | 78,00   | 78,00  | 180,00  | 130,00 | 78,00   | 78,00  | 460,00  |
|      |      | 78,00   | 78,00  | 78,00   | 78,00  |         |        |         |
|      |      | 50,00   | 78,00  | 290,00  | 260,00 | 115,00  | 55,00  | 495,00  |
|      |      | 410,00  | 78,00  | 255,00  | 100,00 | 260,00  | 78,00  | 185,00  |
| 5,00 | 5,00 | 81,00   | 170,00 | 420,00  | 760,00 |         |        |         |
| 5,00 | 5,00 | 200,00  | 75,00  | 290,00  | 270,00 | 180,00  | 170,00 | 555,00  |
|      |      | 1735,00 | 955,00 | 1890,00 | 760,00 | 1970,00 | 570,00 | 1600,00 |
| 5,00 | 5,00 | 235,00  | 100,00 | 480,00  | 820,00 | 180,00  | 78,00  | 3205,00 |
|      |      | 78,00   | 83,00  | 135,00  | 78,00  | 78,00   | 78,00  | 78,00   |
|      |      | 78,00   | 78,00  | 78,00   | 78,00  |         |        |         |

|      |      |        |        |         |         |        |        |         |
|------|------|--------|--------|---------|---------|--------|--------|---------|
|      |      | 140,00 | 78,00  | 380,00  | 600,00  | 240,00 | 310,00 | 480,00  |
|      |      | 80,00  | 78,00  | 135,00  | 80,00   | 78,00  | 78,00  | 95,00   |
|      |      | 42,00  | 78,00  | 78,00   | 78,00   | 78,00  | 78,00  | 80,00   |
| 5,00 | 5,00 |        |        |         |         |        |        |         |
| 5,00 | 5,00 | 87,00  | 78,00  | 330,00  | 450,00  | 330,00 | 78,00  | 490,00  |
|      |      | 78,00  | 50,00  | 935,00  | 1050,00 | 78,00  | 78,00  | 1155,00 |
|      |      | 50,00  | 120,00 | 1695,00 | 1690,00 | 78,00  | 295,00 | 1680,00 |
|      |      | 720,00 | 270,00 | 1450,00 | 810,00  | 550,00 | 350,00 | 1140,00 |
| 5,00 | 5,00 |        |        |         |         |        |        |         |
|      |      | 110,00 | 78,00  | 1220,00 | 3380,00 | 270,00 | 320,00 | 1680,00 |
| 5,00 | 5,00 | 220,00 | 90,00  | 290,00  | 800,00  | 200,00 | 78,00  | 515,00  |
| 5,00 | 5,00 | 78,00  | 78,00  | 78,00   | 78,00   | 78,00  | 78,00  | 400,00  |
|      |      | 454,00 | 85,30  | 25,10   | 436,00  | 16,60  | 8,00   | 0,81    |
|      |      | 298,00 | 0,28   | 25,80   | 293,00  | 19,50  | 2,00   | 1,23    |
| 5,00 | 5,00 | 78,00  | 78,00  | 80,00   | 180,00  | 78,00  | 44,00  | 550,00  |
|      |      | 86,00  | 130,00 | 510,00  | 3260,00 | 730,00 | 210,00 | 1950,00 |
| 5,00 | 5,00 |        |        |         |         |        |        |         |

|      |      |        |        |         |         |        |        |         |
|------|------|--------|--------|---------|---------|--------|--------|---------|
|      |      | 170,00 | 775,00 | 2355,00 | 360,00  | 860,00 | 615,00 | 1815,00 |
|      |      | 610,00 | 190,00 | 1395,00 | 1595,00 | 525,00 | 16,00  | 1520,00 |
| 5,00 | 5,00 | 78,00  | 78,00  | 78,00   | 78,00   | 78,00  | 78,00  | 78,00   |
| 5,00 | 5,00 | 47,00  | 44,00  | 230,00  | 265,00  | 110,00 | 140,00 | 405,00  |
|      |      | 78,00  | 78,00  | 97,00   | 200,00  | 200,00 | 78,00  | 350,00  |
|      |      | 550,00 | 78,00  | 930,00  | 295,00  | 665,00 | 150,00 | 840,00  |
|      |      | 180,00 | 250,00 | 1510,00 | 1850,00 |        |        |         |
|      |      | 78,00  | 78,00  | 78,00   | 78,00   | 78,00  | 78,00  | 110,00  |
| 5,00 | 5,00 | 65,00  | 80,00  | 315,00  | 215,00  | 100,00 | 78,00  | 280,00  |
| 5,00 | 5,00 | 100,00 | 140,00 | 350,00  | 660,00  | 78,00  | 230,00 | 660,00  |



| il17staphhu | il1ramadiu | il1ralps | il1rastaph | il1raada | il1ralpsada | il1rastapha | il10mediun | il10lps |
|-------------|------------|----------|------------|----------|-------------|-------------|------------|---------|
|             | 4445,00    |          | 8695,00    | 4595,00  |             | 8090,00     | 20,00      | 6820,00 |
|             | 7195,00    |          | 8665,00    | 6765,00  |             | 7655,00     | 20,00      | 5780,00 |
|             | 5650,00    |          | 8250,00    | 6275,00  |             | 8000,00     | 20,00      | 5500,00 |
| 2150,00     | 6110,00    |          | 8785,00    | 5340,00  |             | 8610,00     | 20,00      | 6720,00 |
| 1720,00     | 4685,00    |          | 8665,00    | 4745,00  |             | 7420,00     |            | 5740,00 |
| 2550,00     | 8786,00    |          | 8030,00    | 4375,00  |             | 7210,00     |            | 6970,00 |
| 545,00      | 52565,00   |          | 54408,00   |          |             |             |            | 6580,00 |
| 78,00       | 64179,00   |          | 65285,00   |          |             |             |            | 6130,00 |
| 130,00      | 20028,00   |          | 56068,00   |          |             |             |            | 10,00   |
| 78,00       | 51275,00   |          | 66852,00   |          |             |             |            | 60,00   |
| 3160,00     | 9889,00    |          | 68972,00   |          |             |             |            |         |
| 135,00      | 41043,00   |          | 28324,00   |          |             |             |            |         |
| 2390,00     | 46113,00   |          | 57727,00   |          |             |             |            |         |
| 80,00       | 9613,00    |          | 56897,00   |          |             |             |            |         |
| 2720,00     | 1090,00    |          | 42426,00   |          |             |             |            |         |
| 41,00       | 1090,00    |          | 64916,00   |          |             |             |            |         |

6144,00 3616,00 14000,00 6520,00 7246,00 7524,00 10,00 1470,00

1595,00

200,00 3000,00

120,00

3350,00 14000,00 14000,00 6028,00 218,00 14000,00 14000,00 10,00 40,00

6376,00 7516,00 218,00 218,00 6318,00 3568,00 10,00 750,00

25,00 25,00

235,00 3000,00

160,00

3430,00

970,00

335,00

455,00

78,00

10,00 890,00

10,00 10,00



270,00

|         |         |         |         |         |         |       |        |
|---------|---------|---------|---------|---------|---------|-------|--------|
| 6634,00 | 6346,00 | 7990,00 | 6086,00 | 7802,00 | 6818,00 | 10,00 | 495,00 |
| 3914,00 | 7672,00 | 4952,00 | 3060,00 | 218,00  | 218,00  | 10,00 | 165,00 |

475,00

355,00

|        |         |         |          |          |          |          |        |        |
|--------|---------|---------|----------|----------|----------|----------|--------|--------|
|        | 218,00  | 218,00  | 17380,00 | 14000,00 | 14000,00 | 14000,00 | 10,00  | 85,00  |
|        |         |         |          |          |          |          | 10,00  | 465,00 |
| 395,00 | 6770,00 | 7940,00 | 8030,00  | 6260,00  | 218,00   | 218,00   | 210,00 | 205,00 |

|  |         |          |          |         |        |        |        |        |
|--|---------|----------|----------|---------|--------|--------|--------|--------|
|  | 7410,00 | 14000,00 | 14810,00 | 6472,00 | 218,00 | 218,00 | 245,00 | 190,00 |
|--|---------|----------|----------|---------|--------|--------|--------|--------|

640,00

165,00 500,00

1095,00

275,00

|          |         |        |        |          |          |       |        |
|----------|---------|--------|--------|----------|----------|-------|--------|
| 14000,00 | 8866,00 | 218,00 | 218,00 | 14000,00 | 14000,00 | 10,00 | 490,00 |
|----------|---------|--------|--------|----------|----------|-------|--------|

830,00  
105,00

65,00  
460,00

1575,00  
1095,00  
740,00

4298,00 218,00 14000,00 7778,00 7434,00 7082,00 10,00 10,00

10,00 220,00

4180,00  
720,00  
260,00

4,40  
3,57

1060,00  
2750,00

|         |         |         |          |          |          |          |        |         |
|---------|---------|---------|----------|----------|----------|----------|--------|---------|
|         | 1786,00 | 218,00  | 14000,00 | 4914,00  | 6740,00  | 6510,00  | 10,00  | 190,00  |
|         |         |         |          |          |          |          | 10,00  | 105,00  |
| 460,00  |         |         |          |          |          |          |        |         |
| 1570,00 |         |         |          |          |          |          |        |         |
| 78,00   |         |         |          |          |          |          |        |         |
| 410,00  |         |         |          |          |          |          |        |         |
|         |         |         |          |          |          |          | 10,00  | 255,00  |
|         |         |         |          |          |          |          | 10,00  | 10,00   |
|         | 2304,00 | 2074,00 | 14000,00 | 14000,00 | 14000,00 | 14000,00 | 100,00 | 3000,00 |
| 260,00  |         |         |          |          |          |          |        |         |
| 175,00  |         |         |          |          |          |          |        |         |
| 84,00   |         |         |          |          |          |          |        |         |
| 230,00  |         |         | 7110,00  |          |          |          | 10,00  | 80,00   |
|         |         |         | 13740,00 |          |          |          | 10,00  | 230,00  |
| 1780,00 |         |         | 16920,00 |          |          |          | 230,00 | 365,00  |
|         | 7818,00 | 6626,00 | 14960,00 | 14000,00 | 14000,00 | 14000,00 | 10,00  | 30,00   |





250,00                    80,00    3000,00    200,00

14,62            8,25    16710,00

30293,00

59939,00

10,00  
10,00  
10,00

10,00  
10,00  
10,00

77778,00

77472,00

72887,00

760,00                    40,00    425,00    255,00  
70,00                    10,00    30,00    10,00

|        |       |       |         |         |      |      |          |
|--------|-------|-------|---------|---------|------|------|----------|
|        |       |       |         |         | 0,00 | 0,00 | 218,00   |
| 10,00  |       | 10,00 | 235,00  | 10,00   |      |      |          |
| 10,00  |       | 10,00 | 215,00  | 430,00  | 2,07 | 2,62 | 90279,00 |
|        | 10,00 |       |         |         |      |      |          |
|        | 10,00 |       |         |         |      |      |          |
| 330,00 |       | 10,00 | 15,00   | 10,00   |      |      |          |
| 135,00 |       | 10,00 | 435,00  | 80,00   |      |      |          |
| 50,00  |       | 10,00 | 10,00   | 10,00   |      |      | 36619,00 |
|        |       |       |         |         |      |      |          |
| 480,00 |       | 10,00 | 295,00  | 435,00  |      |      |          |
|        | 10,00 |       |         |         |      |      |          |
| 390,00 |       | 10,00 | 3000,00 | 3000,00 |      |      |          |
|        |       |       |         |         |      |      |          |
|        |       |       |         |         |      |      | 6078,00  |
|        |       |       |         |         |      |      |          |
| 65,00  |       | 10,00 | 545,00  | 135,00  | 5,88 | 6,96 |          |
|        |       |       |         |         | 0,51 | 6,86 | 88302,00 |





|         |       |         |        |        |       |          |
|---------|-------|---------|--------|--------|-------|----------|
| 10,00   |       | 10,00   | 100,00 | 10,00  |       |          |
| 95,00   |       | 190,00  | 20,00  | 10,00  |       |          |
|         |       |         |        |        |       | 8691,00  |
|         |       |         |        |        |       | 92650,00 |
|         | 10,00 |         |        |        | 10,00 |          |
|         | 10,00 |         |        |        | 10,00 |          |
| 260,00  |       | 10,00   | 775,00 | 495,00 |       |          |
| 370,00  |       | 3000,00 | 10,00  | 10,00  |       |          |
| 1160,00 |       | 10,00   | 580,00 | 65,00  |       |          |
|         | 10,00 |         |        |        | 10,00 |          |
|         | 10,00 |         |        |        | 10,00 |          |
|         |       |         |        |        |       | 85773,00 |
| 10,00   |       | 10,00   | 55,00  | 55,00  |       | 68419,00 |
| 160,00  |       | 10,00   | 260,00 | 10,00  |       |          |
| 150,00  |       | 10,00   | 265,00 | 180,00 |       | 39200,00 |
| 545,00  |       | 10,00   | 315,00 | 115,00 |       |          |
|         |       |         |        |        |       | 87986,00 |



| il10pus | tnfpus   | il1bpus  | il6pus | il1alphapus | il17pus | monocytes count | cd14    | countcd14 |
|---------|----------|----------|--------|-------------|---------|-----------------|---------|-----------|
|         |          |          |        |             |         | 368,00          | 338,00  | 9,00      |
|         |          |          |        |             |         | 438,00          | 412,00  | 4,00      |
|         |          |          |        |             |         | 637,00          | 600,00  | 7,00      |
|         |          |          |        |             |         | 786,00          | 728,00  | 7,00      |
|         |          |          |        |             |         | 600,00          | 580,00  | 1,00      |
|         |          |          |        |             |         | 337,00          | 312,00  | 3,00      |
|         |          |          |        |             |         | 676,00          | 645,00  | 5,00      |
|         |          |          |        |             |         | 351,00          | 323,00  | 5,00      |
|         |          |          |        |             |         | 284,00          | 244,00  | 5,00      |
|         |          |          |        |             |         | 507,00          | 481,00  | 3,00      |
|         |          |          |        |             |         | 91,00           | 80,00   | 1,00      |
|         |          |          |        |             |         | 353,00          | 307,00  | 9,00      |
|         |          |          |        |             |         | 186,00          | 169,00  | 3,00      |
|         |          |          |        |             |         | 181,00          | 150,00  | 6,00      |
|         |          |          |        |             |         |                 |         |           |
|         |          |          |        |             |         | 576,00          | 434,00  | 21,00     |
|         |          |          |        |             |         | 2097,00         | 1937,00 | 41,00     |
|         |          |          |        |             |         | 2018,00         | 1858,00 | 20,00     |
|         |          |          |        |             |         |                 |         |           |
|         |          |          |        |             |         | 564,00          | 533,00  | 2,00      |
|         |          |          |        |             |         |                 |         |           |
|         |          |          |        |             |         | 545,00          | 504,00  | 26,00     |
| 420,00  | 45500,00 | 10100,00 | 910,00 | 220,00      | 2960,00 | 764,00          | 670,00  | 8,00      |
|         |          |          |        |             |         |                 |         |           |
| 10,00   | 20,00    | 16900,00 | 20,00  |             |         |                 |         |           |
|         |          |          |        |             |         |                 |         |           |
|         |          |          |        |             |         | 429,00          | 374,00  | 23,00     |
|         |          |          |        |             |         |                 |         |           |
| 15,00   | 400,00   | 7890,00  | 910,00 | 140,00      | 80,00   |                 |         |           |
|         |          |          |        |             |         |                 |         |           |
|         |          |          |        |             |         | 450,00          | 413,00  | 6,00      |
|         |          |          |        |             |         | 384,00          | 314,00  | 6,00      |
|         |          |          |        |             |         |                 |         |           |
|         |          |          |        |             |         | 1027,00         | 946,00  | 11,00     |
|         |          |          |        |             |         |                 |         |           |
|         |          |          |        |             |         | 647,00          | 531,00  | 11,00     |

|        |          |          |         |         |         |         |         |       |
|--------|----------|----------|---------|---------|---------|---------|---------|-------|
|        |          |          |         |         |         | 870,00  | 839,00  | 2,00  |
|        |          |          |         |         |         | 624,00  | 586,00  | 4,00  |
| 10,00  | 2200,00  | 80,00    | 590,00  | 40,00   | 80,00   | 402,00  | 375,00  | 3,00  |
|        |          |          |         |         |         | 351,00  | 335,00  | 4,00  |
|        |          |          |         |         |         | 424,00  | 385,00  | 6,00  |
| 10,00  | 2700,00  | 30300,00 | 1510,00 | 1060,00 | 4220,00 | 558,00  | 507,00  | 13,00 |
|        |          |          |         |         |         | 469,00  | 412,00  | 15,00 |
| 10,00  | 3600,00  | 27900,00 | 1500,00 | 760,00  | 80,00   | 396,00  | 358,00  | 9,00  |
|        |          |          |         |         |         | 345,00  | 314,00  | 4,00  |
| 495,00 | 10000,00 | 83500,00 | 930,00  | 440,00  | 240,00  | 1426,00 | 1343,00 | 19,00 |
|        |          |          |         |         |         | 335,00  | 278,00  | 4,00  |
| 10,00  | 400,00   | 8000,00  | 500,00  | 320,00  | 80,00   | 1393,00 | 28,00   | 43,00 |
|        |          |          |         |         |         | 697,00  | 665,00  | 6,00  |
|        |          |          |         |         |         | 691,00  | 611,00  | 19,00 |
| 10,00  | 20,00    | 3500,00  | 20,00   |         |         | 634,00  | 537,00  | 12,00 |
|        |          |          |         |         |         | 1080,00 | 977,00  | 17,00 |

95,00 400,00 4600,00 310,00 260,00 80,00

10,00 400,00 4050,00 2470,00 80,00 80,00 600,00 554,00 13,00

689,00 45,00 56,00

10,00 20,00 2020,00 740,00 40,00 80,00 854,00 815,00 3,00

504,00 467,00 5,00  
544,00 474,00 11,00  
630,00 583,00 12,00  
302,00 276,00 4,00

595,00 554,00 7,00

10,00 800,00 2060,00 350,00 40,00 80,00

482,00 462,00 2,00

210,00 33700,00 47300,00 650,00 320,00 80,00 1179,00 17,00 53,00

|       |          |          |         |        |        |         |         |       |
|-------|----------|----------|---------|--------|--------|---------|---------|-------|
|       |          |          |         |        |        | 1422,00 | 1331,00 | 18,00 |
| 10,00 | 20,00    | 9760,00  | 200,00  | 100,00 | 80,00  |         |         |       |
| 10,00 | 2400,00  | 44500,00 | 150,00  | 120,00 | 860,00 | 795,00  | 748,00  | 7,00  |
| 10,00 | 400,00   | 22500,00 | 1000,00 | 360,00 | 80,00  |         |         |       |
| 40,00 | 13200,00 | 4000,00  | 20,00   |        |        | 904,00  | 858,00  | 12,00 |
|       |          |          |         |        |        | 718,00  | 656,00  | 13,00 |
|       |          |          |         |        |        | 412,00  | 339,00  | 9,00  |
|       |          |          |         |        |        | 463,00  | 408,00  | 6,00  |
|       |          |          |         |        |        | 372,00  | 340,00  | 5,00  |
| 10,00 | 245,00   | 7700,00  | 200,00  | 100,00 | 40,00  | 783,00  | 726,00  | 14,00 |
| 10,00 | 2500,00  | 19900,00 | 20,00   |        |        |         |         |       |
|       |          |          |         |        |        | 370,00  | 340,00  | 5,00  |
|       |          |          |         |        |        | 316,00  | 305,00  | 2,00  |
|       |          |          |         |        |        | 625,00  | 563,00  | 18,00 |
| 90,00 | 80,00    | 54000,00 | 1800,00 |        |        |         |         |       |
|       |          |          |         |        |        | 318,00  | 268,00  | 7,00  |
|       |          |          |         |        |        | 180,00  | 172,00  | 2,00  |
| 10,00 | 900,00   | 19600,00 | 400,00  |        |        |         |         |       |

508,00 457,00 9,00

467,00 423,00 9,00

90,00 2500,00

10,00 40700,00 24200,00 500,00

527,00 497,00 3,00

425,00 370,00 13,00

324,00 303,00 3,00

449,00 395,00 20,00

634,00 600,00 4,00

479,00 408,00 8,00

493,00 441,00 13,00

10,00 15000,00 405,00 365,00 3,00

10,00 18600,00 8200,00 250,00 140,00 80,00 1053,00 855,00 55,00

10,00 7100,00 6220,00 700,00 40,00 80,00 451,00 410,00 7,00  
405,00 372,00 4,00

10,00 1500,00 49900,00 700,00

978,00 916,00 6,00



countcd14| countcd14| countcd14negcd16bright

|       |       |       |
|-------|-------|-------|
| 13,00 | 5,00  | 4,00  |
| 17,00 | 5,00  | 0,00  |
| 18,00 | 3,00  | 2,00  |
| 33,00 | 13,00 | 9,00  |
| 13,00 | 2,00  | 1,00  |
| 13,00 | 5,00  | 2,00  |
| 15,00 | 4,00  | 2,00  |
| 15,00 | 3,00  | 3,00  |
| 26,00 | 4,00  | 10,00 |
| 15,00 | 3,00  | 1,00  |
| 3,00  | 3,00  | 3,00  |
| 18,00 | 15,00 | 9,00  |
| 6,00  | 5,00  | 2,00  |
| 7,00  | 8,00  | 5,00  |

|       |       |      |
|-------|-------|------|
| 83,00 | 26,00 | 6,00 |
| 75,00 | 21,00 | 5,00 |
| 80,00 | 33,00 | 9,00 |

|       |      |      |
|-------|------|------|
| 16,00 | 6,00 | 4,00 |
|-------|------|------|

|       |       |       |
|-------|-------|-------|
| 7,00  | 3,00  | 1,00  |
| 42,00 | 17,00 | 16,00 |

|       |      |      |
|-------|------|------|
| 25,00 | 5,00 | 2,00 |
|-------|------|------|

|       |       |       |
|-------|-------|-------|
| 21,00 | 5,00  | 2,00  |
| 33,00 | 23,00 | 21,00 |

|       |      |      |
|-------|------|------|
| 40,00 | 6,00 | 4,00 |
|-------|------|------|

|       |       |       |
|-------|-------|-------|
| 41,00 | 69,00 | 21,00 |
|-------|-------|-------|

|       |      |      |
|-------|------|------|
| 7,00  | 3,00 | 1,00 |
| 14,00 | 3,00 | 1,00 |

|       |      |      |
|-------|------|------|
| 11,00 | 5,00 | 1,00 |
|-------|------|------|

|       |      |      |
|-------|------|------|
| 5,00  | 2,00 | 1,00 |
| 14,00 | 9,00 | 3,00 |

|       |      |      |
|-------|------|------|
| 23,00 | 6,00 | 6,00 |
|-------|------|------|

|       |       |      |
|-------|-------|------|
| 25,00 | 8,00  | 9,00 |
| 15,00 | 8,00  | 5,00 |
| 9,00  | 12,00 | 5,00 |
| 28,00 | 12,00 | 7,00 |

|       |       |       |
|-------|-------|-------|
| 35,00 | 11,00 | 11,00 |
|-------|-------|-------|

|      |      |      |
|------|------|------|
| 9,00 | 2,00 |      |
| 9,00 | 3,00 | 1,00 |

|       |       |      |
|-------|-------|------|
| 39,00 | 12,00 | 7,00 |
|-------|-------|------|

|       |       |       |
|-------|-------|-------|
| 61,00 | 20,00 | 11,00 |
| 61,00 | 11,00 | 8,00  |

|       |      |      |
|-------|------|------|
| 15,00 | 3,00 | 2,00 |
|-------|------|------|

|       |       |       |
|-------|-------|-------|
| 29,00 | 25,00 | 20,90 |
|-------|-------|-------|

|       |      |      |
|-------|------|------|
| 14,00 | 4,00 | 3,00 |
|-------|------|------|

|       |       |      |
|-------|-------|------|
| 12,00 | 5,00  | 1,00 |
| 35,00 | 17,00 | 9,00 |
| 12,00 | 11,00 | 2,00 |
| 15,00 | 4,00  | 4,00 |

|       |      |      |
|-------|------|------|
| 19,00 | 6,00 | 2,00 |
|-------|------|------|

|       |      |      |
|-------|------|------|
| 10,00 | 3,00 | 5,00 |
|-------|------|------|

|       |      |  |
|-------|------|--|
| 26,00 | 7,00 |  |
|-------|------|--|

|       |      |      |
|-------|------|------|
| 53,00 | 6,00 | 4,00 |
|-------|------|------|

|       |       |      |
|-------|-------|------|
| 19,00 | 11,00 | 6,00 |
|-------|-------|------|

|       |      |      |
|-------|------|------|
| 15,00 | 3,00 | 2,00 |
|-------|------|------|

|       |       |      |
|-------|-------|------|
| 26,00 | 10,00 | 2,00 |
|-------|-------|------|

|       |       |       |
|-------|-------|-------|
| 24,00 | 37,00 | 42,00 |
|-------|-------|-------|

|       |       |       |
|-------|-------|-------|
| 21,00 | 21,00 | 12,00 |
|-------|-------|-------|

|       |      |      |
|-------|------|------|
| 14,00 | 8,00 | 6,00 |
|-------|------|------|

|       |       |      |
|-------|-------|------|
| 23,00 | 10,00 | 2,00 |
|-------|-------|------|

|       |      |       |
|-------|------|-------|
| 10,00 | 8,00 | 11,00 |
|-------|------|-------|

|      |      |      |
|------|------|------|
| 5,00 | 3,00 | 1,00 |
|------|------|------|

|       |      |      |
|-------|------|------|
| 35,00 | 8,00 | 6,00 |
|-------|------|------|

|       |       |      |
|-------|-------|------|
| 24,00 | 13,00 | 2,00 |
|-------|-------|------|

|      |      |      |
|------|------|------|
| 2,00 | 1,00 | 1,00 |
|------|------|------|

|       |      |      |
|-------|------|------|
| 27,00 | 5,00 | 0,00 |
|-------|------|------|

|       |      |      |
|-------|------|------|
| 18,00 | 8,00 | 6,00 |
|-------|------|------|

|       |      |      |
|-------|------|------|
| 10,00 | 4,00 | 2,00 |
|-------|------|------|

|       |       |      |
|-------|-------|------|
| 23,00 | 11,00 | 5,00 |
|-------|-------|------|

|      |      |      |
|------|------|------|
| 7,00 | 3,00 | 1,00 |
|------|------|------|

|       |      |      |
|-------|------|------|
| 24,00 | 3,00 | 2,00 |
|-------|------|------|

|       |      |      |
|-------|------|------|
| 15,00 | 8,00 | 2,00 |
|-------|------|------|

|       |       |      |
|-------|-------|------|
| 33,00 | 19,00 | 5,00 |
|-------|-------|------|

|       |      |      |
|-------|------|------|
| 23,00 | 9,00 | 6,00 |
|-------|------|------|

|       |      |      |
|-------|------|------|
| 24,00 | 9,00 | 3,00 |
|-------|------|------|

|       |       |      |
|-------|-------|------|
| 97,00 | 21,00 | 6,00 |
|-------|-------|------|

|       |      |      |
|-------|------|------|
| 17,00 | 7,00 | 4,00 |
|-------|------|------|

|       |      |      |
|-------|------|------|
| 12,00 | 6,00 | 4,00 |
|-------|------|------|

14,00

24,00

8,00
